# Supplementary material for: The bacterial ribonuclease P holoenzyme requires specific, conserved residues for efficient catalysis and substrate positioning
Source: PubMed Central journal article supplement — Nucleic Acids Res. 2012 Aug 13;40(20):10384–93. doi: 10.1093/nar/gks744 (PMC3488217; doi:10.1093/nar/gks744), 2012-08-13
Supplement: supp_gks744_Reiter-etal-SI.pdf [file supp_gks744_Reiter-etal-SI.pdf]

## Supplemental Information

### **The bacterial ribonuclease P holoenzyme requires specific, conserved residues for efficient catalysis and substrate positioning**

Nicholas J. Reiter<sup>1\*</sup>, Amy Osterman<sup>1</sup>, and Alfonso Mondragón<sup>1\*</sup>

<sup>1</sup>Department of Molecular Biosciences, Northwestern University, Evanston, IL, 60208 USA

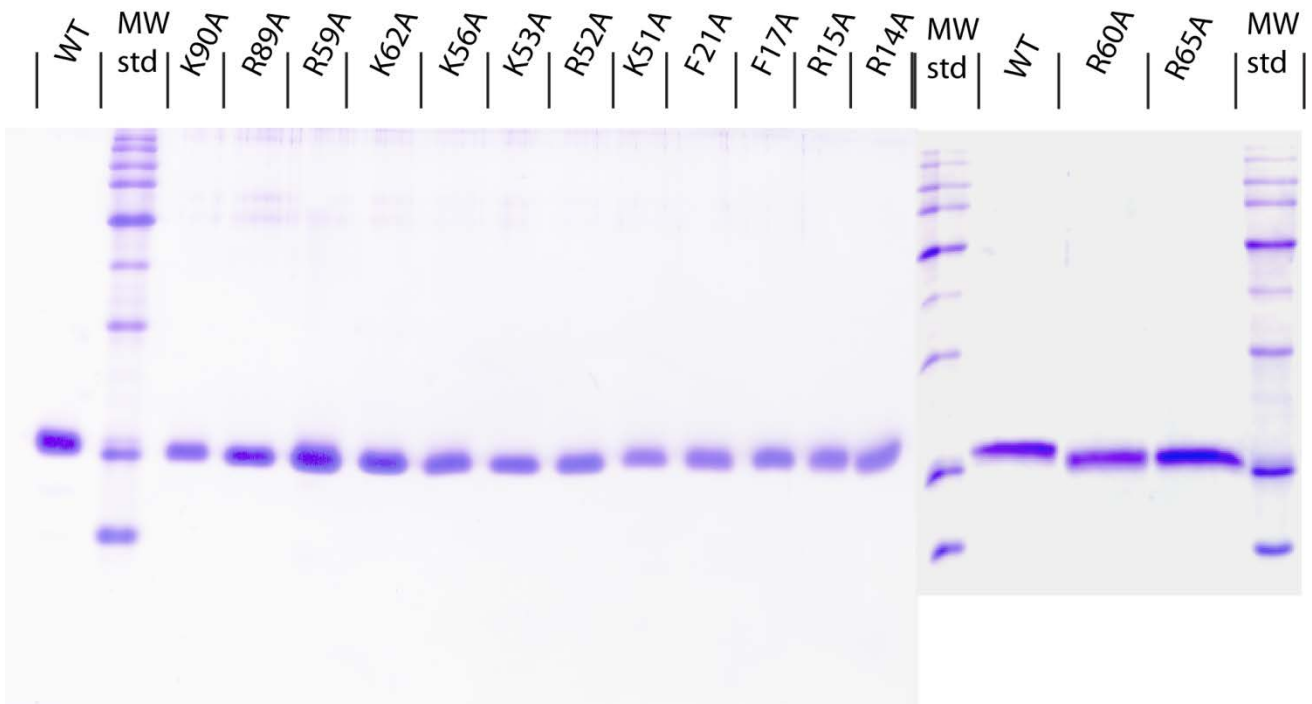

**Supplemental Figure 1: SDS-PAGE gel showing the purity of all *T. maritima* RNase P protein point mutants used in the cleavage activity assays.** Specific point mutants were targeted based on the structure of the complex (rcsb: 3Q1R) and/or regions of high sequence conservation across bacteria. The identity of each mutant was confirmed by DNA sequencing and mass spectrometry of the purified protein.

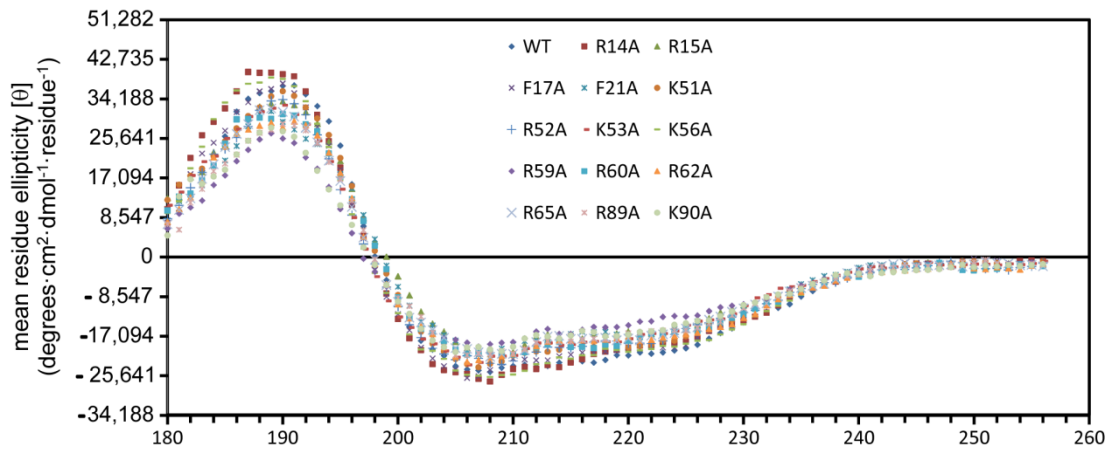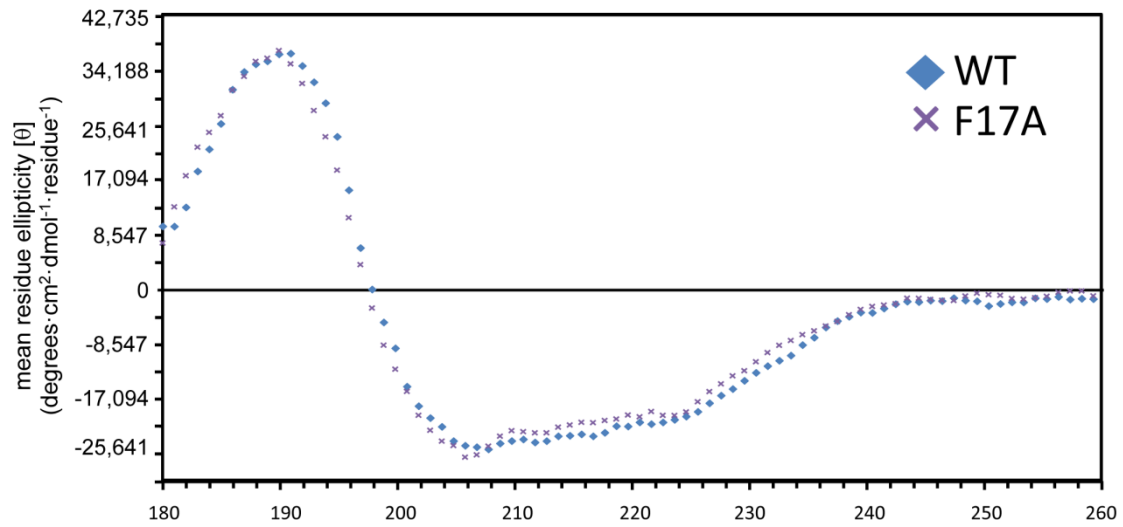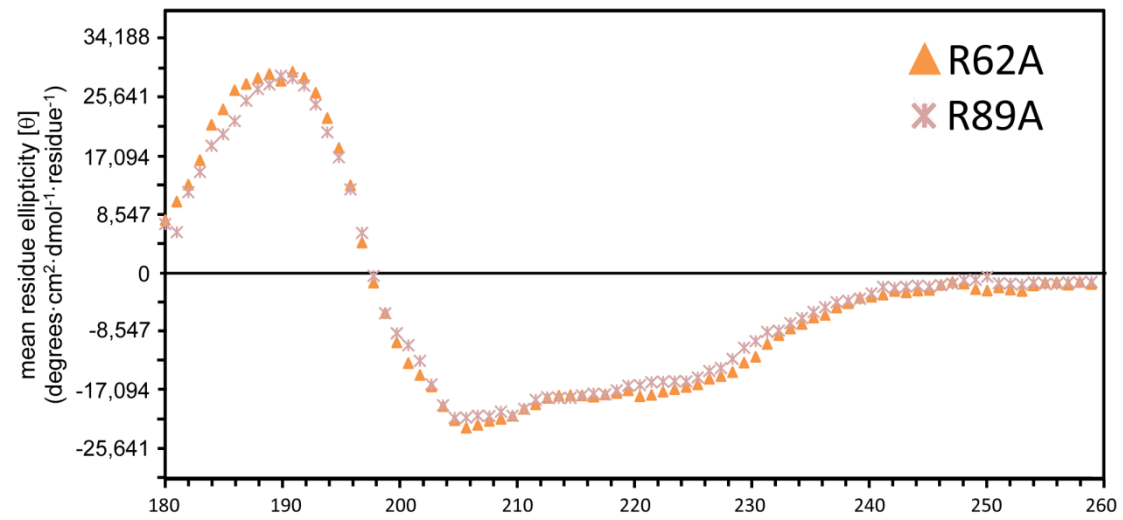

Wavelength (nm)

**Supplemental Figure 2: Overlays of the circular dichroism (CD) wavelength scans of the wild-type and RNase P protein mutants show that all mutants are well folded and with no differences in their secondary structure (top).** Selective overlay of CD scans comparing the F17A and wild-type P protein (middle) and the R62A and R89A mutant proteins (bottom) reveal near identical ellipticity profiles, demonstrating that F17A and R89A are not mis-folded, but rather, adopt identical secondary structures as functionally active forms of the RNase P protein. Data were collected on a Jasco J-815 as described in the experimental methods section.

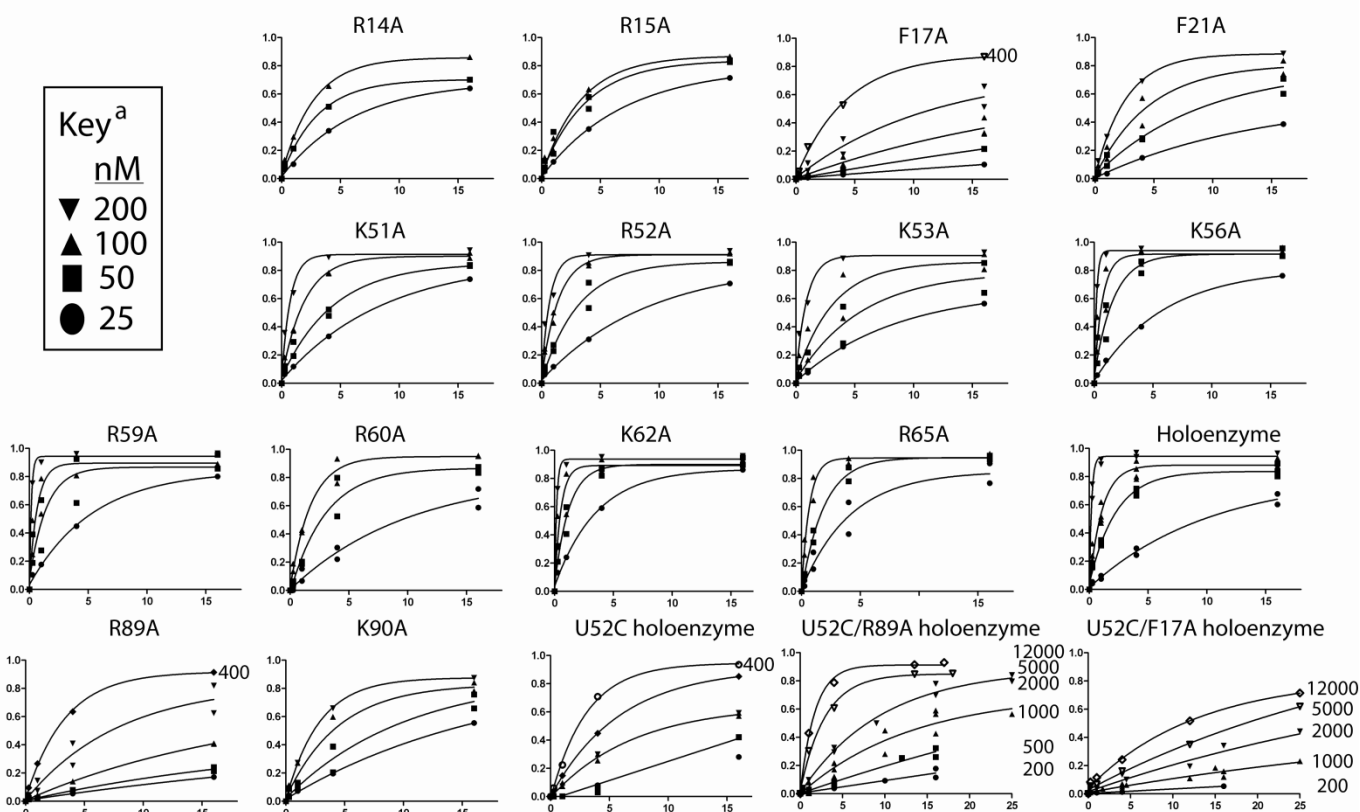

**Figure 3: Representative observed kinetic profiles ( $k_{obs}$ ) of the *T. maritima* RNase P protein and point mutants, showing the percentage of product (y-axis) over time (min.) (x-axis).** Nearly all time course cleavage reactions were performed in duplicate and were performed at standard linear enzyme concentration ranges (25 – 200 nM), with the only exceptions being the R89A, F17A, U52C holoenzyme, and double mutants (*dm*) (U52C RNA/R89A or U52C/F17A) due to the dramatic decreases in activity. In both *dm* cases, enzyme concentrations ranged from 200 – 12000 nM.
